# Supplementary material for: The impact of intersectional racial and gender biases on minority female leadership over two centuries
Source: PubMed Central journal article supplement (PMC10762112; doi:10.1038/s41598-023-50392-x), 2024-01-02
Supplement: 41598_2023_50392_MOESM1_ESM.pdf [file 41598_2023_50392_MOESM1_ESM.pdf]

# Supplementary Information

## (NOT INTENDED FOR PUBLICATION)

### Appendix A

#### Example of Excluded Political Advertisement

We exclude speech specimens containing deliberate political advertisement, which are much shorter than those in our dataset and have a particular structure, usually heavily regulated (e.g., the candidate always must endorse the message by stating they “approve” it). Such political advertisements are usually not informative as their main goal is to attract attention to the candidate to encourage voters to look for more information about the candidate rather than to state the candidate’s point of view. Such political advertisement often also include content from other people. We present two examples of political advertisement for Hillary Clinton below:

*Example 1:*

#### She Always - Sep. 20, 2016

Hillary Rodham Clinton

September 20, 2016

[Print friendly](#)

[Video](#)

**Campaign status:** Lost

**CATEGORIES:** POLITICAL ADS, TV

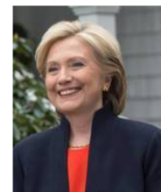

Hillary Rodham Clinton

CLINTON: I've always been familiar with poverty, and I've always done what I could to alleviate it and to help people. The rich are getting a whole lot richer, the middle is stagnating, and the poor are getting poorer. Now that is not good news for the American democracy. This country needs to give dignity to work, to make sure that women and men who work full-time earn a wage that lifts them out of poverty. Corporate executives have profited personally so much when the average worker in America have seen their wages and benefits basically stagnate. A new beginning that makes Wall Street shoulder its responsibility for this crisis. One that makes the most well-off among us pay our fair share. We all want an economy with more opportunity and less inequality. Where Wall Street can never wreck Main Street again. We need to make sure our economy works for everyone, not just those at the top. I'm Hillary Clinton, and I've always approved this message.

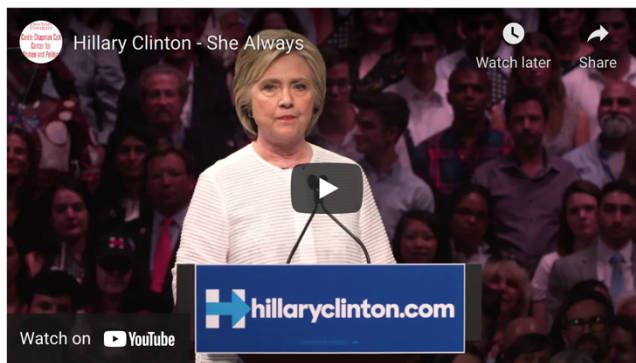

Example 2:

## First Lady Michelle Obama on Voting - Nov. 3, 2016

Hillary Rodham Clinton

November 03, 2016

[Print friendly](#)

[Video](#)

Campaign status: Lost

CATEGORIES: POLITICAL ADS, WEB EXCLUSIVE

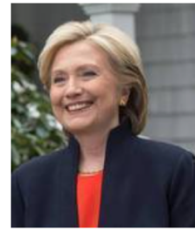

Hillary Rodham Clinton

MICHELE OBAMA: Voting is how we express our values and choose the leaders we trust to shape the future for our children. And in this election, I'm casting my vote early for Hillary Clinton, and I urge you to vote early for Hillary, too.

MAN: You know that your vote counts. It's very important that we all get out and vote.

MICHELE OBAMA: I'm voting for Hillary because she shares my values, because she believes in equality, opportunity, hard work. I'm voting for Hillary because after her career as a lawyer, a law professor, First Lady of Arkansas, First Lady of the United States, a U.S. Senator, and Secretary of State, Hillary has more experience and exposure to the Presidency than anyone in our lifetime. And she is by far the most qualified candidate in this election. And I'm voting for Hillary because she has concrete, detailed policies that will actually make a difference in people's lives. Making college affordable, helping families pay their bills, improving our children's schools, and so much more. So Hillary has done her job, now it's time for us to do our job.

MAN #2: She's been a champion for us, and I want to be a champion for her.

MICHELE OBAMA: And get her elected President of the United States.

WOMAN: We're electing the first female president!

WOMAN #2: I'm so excited!

MICHELE OBAMA: That's why folks across this country, including Barack and I, are voting early. And early voting couldn't be easier. Barack voted early in person by showing up to an early vote location in our hometown of Chicago.

BARACK OBAMA: Ok, let's do this.

MICHELE OBAMA: So vote early if you can or you can join the millions of Americans who will head to the polls on Election Day, November 8. However you choose to cast your vote, just be sure that you make your voice heard and help elect Hillary as our next president. Thanks so much!

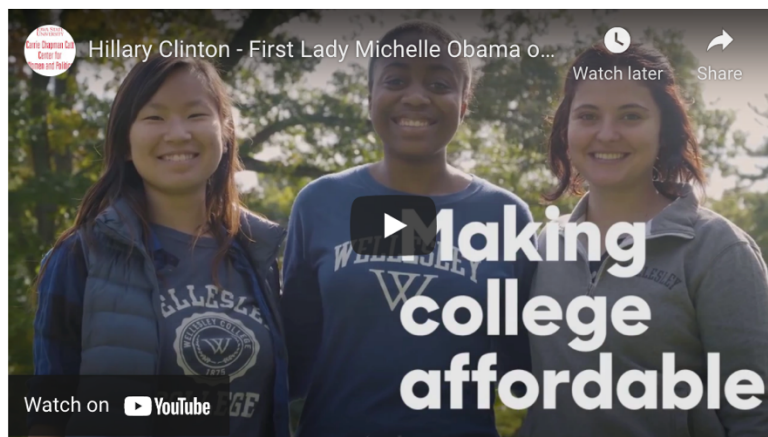

## Appendix B

**Table B1** List of Female Leaders in the Originally Mined Dataset  
(includes all US and non-US leaders)

|                          |                         |                                    |                                |
|--------------------------|-------------------------|------------------------------------|--------------------------------|
| Abby Finkenauer          | Aung San Suu Kyi        | Carmen Perez                       | Cristina Fernandez de Kirchner |
| Abby Kelley Foster       | Aurelia E. Brazeal      | Carol Bellamy                      | Crystal Eastman                |
| Ada Deer                 | Ayanna Pressley         | Carol Browner                      | Cynthia A McKinney             |
| Adelle Hazlett           | Ayoola Obe              | Carol Molnau                       | Cynthia M Lummis               |
| Alexandria Ocasio-Cortez | Barbara A. Goodno       | Carol Moseley Braun                | Cynthia M. Patterson           |
| Alexandrina Rusu         | Barbara B Kennelly      | Carol Shea-Porter                  | Daisy Bates                    |
| Alexis Herman            | Barbara Bush            | Caroline Kennedy                   | Dale S. Brown                  |
| Alice M. Rivlin          | Barbara Comstock        | Carolyn B Maloney                  | Dale Spender                   |
| Alice Paul               | Barbara Coombs Lee      | Carolyn McCarthy                   | Dalia Grybauskaite             |
| Alicia Garza             | Barbara Cubin           | Carrie Chapman Catt                | Dana Loesch                    |
| Alison Lundergan Grimes  | Barbara Dooley          | Carrie P. Meek                     | Darlene K Hooley               |
| Aliza Sherman            | Barbara Ehrenreich      | Catherine Bertini                  | Deb Fischer                    |
| Allee Willis             | Barbara Jordan          | Catherine Cortez Masto             | Debbie A Stabenow              |
| Allyson Schwartz         | Barbara L Boxer         | Catherine Jay Didion               | Debbie Dingell                 |
| Alma Adams               | Barbara Lawton          | Catherine, Duchess of Cambridge    | Debbie Halvorson               |
| Alva Myrdal              | Barbara Lee             | Cathy Cleaver                      | Deborah Blum                   |
| Amata Coleman Radewagen  | Barbara McClintock      | Cathy McMorris Rodgers             | Deborah Morris                 |
| Amelia Earhart           | Barbara Mikulski        | Cecile Richards                    | Deborah Y. Parker              |
| Amsatou Sow Sidibe       | Barbara O'Brien         | Chandrika Bandaranaike Kumaratunga | Debra Stewart                  |
| Amy Kaslow               | Barbara P Bush          | Charlene Barshefsky                | Denise Levertov                |
| Amy Klobuchar            | Barbara S. Cochran      | Charlotte B Nelson                 | Diana Aviv                     |
| Amy Kremer               | Becky Cain              | Charlotte Bunch                    | Diana DeGette                  |
| Amy McGrath              | Becky S Skillman        | Charlotte van Rappard-Boon         | Diana Princess of Wales        |
| Andrea Dworkin           | Begum Khaleda Zia       | Chellie M Pingree                  | Diane Black                    |
| Andrea L. Ireland        | Bella Abzug             | Chelsea Clinton                    | Diane Denish                   |
| Angela D Merkel          | Benazir Bhutto          | Cheri Bustos                       | Diane Nash                     |
| Angelina Grimke Weld     | Bernadine Healy         | Cherie Blair                       | Diane P. Wood                  |
| Anita Borg               | Bertha von Suttner      | Christiane Amanpour                | Diane Watson                   |
| Anita Hill               | Bethany Hall-Long       | Christiane Nuesslein-Volhard       | Dianne Feinstein               |
| Anita Jones              | Betty A Ford            | Christina D Romer                  | Dilma Rousseff                 |
| Anita Roddick            | Betty Friedan           | Christine Gregoire                 | Dina Titus                     |
| Ann Coulter              | Betty McCollum          | Christine Lagarde                  | Dolores Huerta                 |
| Ann Kirkpatrick          | Betty S Sutton          | Christine Todd Whitman             | Donna Christensen              |
| Ann M. Veneman           | Betty Shabazz           | Cindy A. Cohn                      | Donna Edwards                  |
| Ann Marie Buerkle        | Betty Williams          | Cindy Axne                         | Donna Shalala                  |
| Ann McLane Kuster        | Beverly E Perdue        | Cindy H McCain                     | Doris Kearns Goodwin           |
| Ann Richards             | Beverly O'Neill         | Claire McCaskill                   | Doris Matsui                   |
| Ann Wagner               | Billie Jean King        | Claire Wolfe                       | Dorothy Crowfoot Hodgkin       |
| Anna Eshoo               | Blanche Lambert Lincoln | Clare Boothe Luce                  | Dorothy Denning                |
| Anna Howard Shaw         | Bonnie Kestner          | Clare Short                        | Dorothy Height                 |
| Anna Kelton Wiley        | Bonnie Watson Coleman   | Claudia Alta "Lady Bird" Johnson   | Dr. Kathleen C. Bailey         |
| Anna Lindh               | Brenda Laurel           | Claudia Tenney                     | Dr. Rita Colwell               |
| Anne C. Petersen         | Brenda Lawrence         | Cokie Roberts                      | Eddie Bernice Johnson          |
| Anne K. Bingaman         | Bronwyn Bishop          | Colleen Hanabusa                   | Eileen B. Claussen             |
| Anne M Mulcahy           | Brooke Astor            | Condoleezza Rice                   | Eileen Collins                 |
| Annie Sprinkle           | Callie Khouri           | Constance A. Morella               | Eilene Galloway                |
| Antonia Novello          | Camille Paglia          | Constance Yai                      | Elaine L Chao                  |
| Arundhati Roy            | Candice Miller          | Corazon Aquino                     | Elaine Scruggs                 |
| Atifete Jahjaga          | Candy Crowley           | Coretta Scott King                 | Eleanor Baum                   |
| Audrey McLaughlin        | Carly Fiorina           | Courtney Love                      | Eleanor Holmes Norton          |

**Table B1** continued

|                                      |                         |                         |                                |
|--------------------------------------|-------------------------|-------------------------|--------------------------------|
| Eleanor Roosevelt                    | Frances Moore Lappe     | Ingrid Newkirk          | Jill Biden                     |
| Eleanor Smeal                        | Frances Perkins         | Irene Joliot-Curie      | Jo Ann Harris                  |
| Elena Kagan                          | Frances Willard         | Isabella Beecher Hooker | Jo Jorgensen                   |
| Elisabeth Showalter<br>Muhlenfeld    | Frances Wright          | Ivanka Trump            | Joan Brown Campbell            |
| Elise Stefanik                       | Frederica Wilson        | Iveta Radicova          | Joan Claybrook                 |
| Elizabeth "Betsy" DeVos              | Gabrielle Giffords      | J.K. Rowling            | Joan Ruddock                   |
| Elizabeth "Liz" Cheney               | Gale Norton             | Jacinda Ardern          | Jody Williams                  |
| Elizabeth Cady Stanton               | Geraldine A Ferraro     | Jackie Speier           | Joni Ernst                     |
| Elizabeth Dole                       | Gertrude B. Elion       | Jackie Walorski         | Josephine M. D'Antonio         |
| Elizabeth Dowdeswell                 | Geun-hye Park           | Jacklyn "Jacky" Rosen   | Joy Hakim                      |
| Elizabeth Esty                       | Gill Marcus             | Jacqueline E McGhee     | Joyce Banda                    |
| Elizabeth Glaser                     | Gina Raimondo           | Jacquelynn Davis        | Joyce Beatty                   |
| Elizabeth Gurley Flynn               | Ginette Hemley          | Jadranka Kosor          | Joyce C. Lashof                |
| Elizabeth H Roberts                  | Ginny Brown-Waite       | Jaime Herrera Beutler   | Joycelyn Elders                |
| Elizabeth McAlister                  | Gloria Macapagal-Arroyo | Jamie Gorelick          | Juanita Millender-<br>McDonald |
| Elizabeth Warren                     | Gloria Shatto           | Jamie Rappaport Clark   | Judith A. Best                 |
| Ella Baker                           | Gloria Steinem          | Jan Brewer              | Judith Crist                   |
| Ella T. Grasso                       | Golda Meir              | Jan Schakowsky          | Judith E. Heumann              |
| Ellen DeGeneres                      | Grace Meng              | Jane Addams             | Judith L. Palkovitz            |
| Ellen Greenlee                       | Grace Napolitano        | Jane Alexander          | Judith Lichtman                |
| Ellen Hancock                        | Greta Thunberg          | Jane Butler Kahle       | Judith Rich Harris             |
| Ellen Johnson Sirleaf                | Gretchen Driskell       | Jane Dee Hull           | Judith Rodin                   |
| Ellen S. Hurwitz                     | Gretchen Whitmer        | Jane Fonda              | Judith Wallerstein             |
| Ellen Tauscher                       | Gro Harlem Brundtland   | Jane Harman             | Judy Biggert                   |
| Elousie Cobell                       | Gwen Graham             | Janet A Napolitano      | Judy Chu                       |
| Emily Cain                           | Gwen Ifill              | Janet G. Bostwick       | Julia Brownley                 |
| Emily Greene Balch                   | Gwen Moore              | Janet Jagan             | Julia Gillard                  |
| Emma Goldman                         | Haley Stevens           | Janet Mills             | Julia Taft                     |
| Emma Gonzalez                        | Hanan Al-Shaykh         | Janet Reno              | Julia Ward Howe                |
| Emma Watson                          | Hattie Caraway          | Janet Southby           | Kamala Harris                  |
| Emmeline Pankhurst                   | Hazel O'Leary           | Janet Yellen            | Kamla Persad-Bissessar         |
| Erica Jong                           | Heidi Heitkamp          | Janice Hahn             | Karen Bass                     |
| Erna Solberg                         | Helen Alvare            | Janice Shaw Crouse      | Karen Hughes                   |
| Ernestine L. Rose                    | Helen Boosalis          | Jari Askins             | Karen M. Torres                |
| Ester Dyson                          | Helen Chenoweth         | Jean A. Wright          | Karen Pence                    |
| Eva Clayton                          | Helen E Clark           | Jean M Schmidt          | Karyn Polito                   |
| Eva Persson Goransson                | Helen Gahagan Douglas   | Jeanne J Kirkpatrick    | Kate Michelman                 |
| Eveline Widmer-Schlumpf              | Helen Gurley Brown      | Jeanne Diebolt          | Katha Pollitt                  |
| Evelyn Sanquineti                    | Helen Hamilton Gardener | Jeanne Hurley Simon     | Katharine T. Bartlett          |
| Faith Ringgold                       | Helen Keller            | Jeanne Shaheen          | Katherine "Kate" Brown         |
| Fannie Lou Hamer                     | Helen Prejean           | Jenean Hampton          | Katherine Clark                |
| Faye Wattleton                       | Helle Thorning-Schmidt  | Jennifer Carroll        | Katherine Lund Hicks           |
| Florence J. Harriman                 | Mrs Henry Weddington    | Jennifer Dunn           | Katherine O'Regan              |
| Florence Kelley                      | Herta Muller            | Jennifer Long           | Katherine P. Prescott          |
| Fran Ulmer                           | Hilda Solis             | Jennifer M Granholm     | Kathie Lee Gifford             |
| France Anne Cordova                  | Hillary Rodham Clinton  | Jennifer Gonzalez       | Kathleen B Blanco              |
| Frances "Fannie" Barrier<br>Williams | Ida B Wells             | Jenny Beth Martin       | Kathleen Kennedy<br>Townsend   |
| Frances "Sissy" Farenthold           | Ida H. Harper           | Jenny Horne             | Kathleen Rice                  |
| Frances D. Gage                      | Ilhan Omar              | Jenny Shipley           | Kathleen Sebelius              |
| Frances Ellen Watkins<br>Harper      | Indira Gandhi           | Jessica Gonzalez-Rojas  | Kathleen Sullivan              |

**Table B1** continued

|                            |                             |                              |                              |
|----------------------------|-----------------------------|------------------------------|------------------------------|
| Kathryn Fuller             | Lois Frankel                | Marine Le Pen                | Michele Reagan               |
| Kathy A Dahlkemper         | Lois J. Schiffer            | Marion C. Blakey             | Micheline Calmy-Rey          |
| Kathy Castor               | Loretta Lynch               | Marjorie Dannenfelser        | Michelle Bachelet            |
| Kathy Hochul               | Loretta Sanchez             | Marsha Blackburn             | Michelle Lujan Grisham       |
| Katie Louchheim            | Louise Arbour               | Marsha Rosenbaum             | Michelle Nowlin              |
| Katie McGinty              | Louise Frechette            | Martha Krebs                 | Michelle Nunn                |
| Katrin Jakobsdottir        | Louise M Slaughter          | Martha McSally               | Michelle Obama               |
| Katrina Pierson            | Lucille Roybal-Allard       | Martha Roby                  | Mimi Walters                 |
| Kay Bailey Hutchison       | Lucinda Davis               | Mary A. Safford              | Molly Corbett Broad          |
| Kay Granger                | Lucretia Mott               | Mary Anderson                | Molly Ivins                  |
| Kay Hagan                  | Lucy McBath                 | Mary Bono                    | Monica Wehby                 |
| Kay Ivey                   | Lucy Stone                  | Mary Brown Bullock           | Morgan Carroll               |
| Kazimira Prunskiene        | Luisa D Diogo               | Mary Burke                   | Mother Teresa                |
| Keli Carender              | Lupe Valdez                 | Mary Burnett Talbert         | Mrs. Asha Das                |
| Kelli Ward                 | Lyn Stinson                 | Mary Carter Smith            | Mrs. Hak Ja Han Moon         |
| Kelly Ayotte               | Lynn Jenkins                | Mary Cavanaugh               | Mrs. Sia Koroma              |
| Kelly H. Carnes            | Lynn Sherr                  | Mary Church Terrell          | Mrs. T. J. Blankert-van Veen |
| Kellyanne Conway           | Lynn Woolsey                | Mary D. Nichols              | Ms. Holmes                   |
| Kersti Kaljulaid           | Lynne Cheney                | Mary E Kramer                | Muriel Bowser                |
| Kim Campbell               | M. Jodi Rell                | Mary E Peters                | Nadezhda Mihailova           |
| Kim Guadagno               | Mabel Vernon                | Mary Elizabeth "Tipper" Gore | Nadine Gordimer              |
| Kim Phuc                   | Madeleine Albright          | Mary Fallin                  | Nadine Strossen              |
| Kim Reynolds               | Madeleine Bordallo          | Mary Fisher                  | Nafis Sadik                  |
| Kim Weaver                 | Madeleine L'Engle           | Mary Jane Coggeshall         | Nan Hayworth                 |
| Kimberle Williams Crenshaw | Maggie Hassan               | Mary Jo Kilroy               | Nan Keohane                  |
| Kirsten E Gillibrand       | Mairead Maguire             | Mary L. Azcuenaga            | Nancy A Dunkel               |
| Kristi Noem                | Malala Yousafzai            | Mary Landrieu                | Nancy Birdsall               |
| Kyrsten Sinema             | Marcia L Fudge              | Mary O'Rourke                | Nancy Gertner                |
| Laura Bush                 | Marcia Pally                | Mary P McAleese              | Nancy Kassebaum Baker        |
| Laura Chinchilla           | Marcia S. Smith             | Mary Pena                    | Nancy Lord                   |
| Laura D'Andrea Tyson       | Marcy C Kaptur              | Mary Reynolds                | Nancy Pelosi                 |
| Laura Kelly                | Margaret Atwood             | Mary Robinson                | Nancy Reagan                 |
| Laura Richardson           | Margaret Chase Smith        | Mary Taylor                  | Nancy Rubin                  |
| Laurie Marker              | Margaret H Sanger           | Mary-Claire King             | Nancy W. Dickey              |
| Lea Rabin                  | Margaret J. Geller          | Maryam Elahi                 | Nancy Wyman                  |
| Lenora B Fulani            | Margaret Spellings          | Marye Anne Fox               | Nanette Diaz Barragan        |
| Lillian Vernon             | Margaret Thatcher           | Matilda Joslyn Gage          | Nannie Helen Burroughs       |
| Linda A. Suydam            | Margaret Warner             | Maxine Waters                | Naomi Wolf                   |
| Linda Chavez-Thompson      | Margaretha de Boer          | Maya Angelou                 | Natalie Tennant              |
| Linda K Kerber             | Marguerite Rivera Houze     | Mazie K Hirono               | Nicole Fontaine              |
| Linda Lingle               | Mari Kiviniemi              | Megan Barry                  | Niki Tsongas                 |
| Linda McMahan              | Maria Cantwell              | Meghan McCain                | Nikki Haley                  |
| Linda S. Fink              | Maria De Los Angeles Florez | Melania Trump                | Nita M Lowey                 |
| Linda Sanchez              | Maria Eva Peron             | Melinda Brown                | Nora Callahan                |
| Linda Sarsour              | Marian Wright Edelman       | Melissa Bean                 | Nora Ephron                  |
| Linda Tarr-Whelan          | Marianne Williamson         | Meredith Monk                | Norma Torres                 |
| Lisa Blunt Rochester       | Mariannette Miller-Meeks    | Mia Love                     | Nydia Velazquez              |
| Lisa Murkowski             | Marie Curie                 | Michaëlle Jean               | Olympia Jean Snowe           |
| Lisa P Jackson             | Marie-Andree Bertrand       | Michele M Bachmann           | Opal Tometi                  |
| Lois Capps                 | Marilyn Tucker Quayle       | Michele Norris               | Oprah Winfrey                |

**Table B1** continued

|                                   |                       |                              |                       |
|-----------------------------------|-----------------------|------------------------------|-----------------------|
| Pam Iorio                         | S.E. Cupp             | Susan C Schwab               | Winona LaDuke         |
| Pamela J. Parker                  | Sadako Ogata          | Susan Collins                | Wislawa Szymborska    |
| Patricia A. McGuire               | Sally Pederson        | Susan Davis                  | Yulia Tymoshenko      |
| Patricia Schroeder                | Sally Quillian Yates  | Susan E Rice                 | Yvette D Clarke       |
| Patrisse Khan-Cullors             | Sally Quinn           | Susan Eckerly                | Yvonne Prettner Solon |
| Patsy Mink                        | Sally Regenhard       | Susan Esserman               | Zoe Lofgren           |
| Patty Judge                       | Samantha Power        | Susan Faludi                 | Zuzana Caputova       |
| Patty Murray                      | Sandy Adams           | Susan Golding                |                       |
| Paula Casey                       | Sandy Thurman         | Susan Hammer                 |                       |
| Paula Treckel                     | Sarah Bain            | Susan Molinari               |                       |
| Paulina W. Davis                  | Sarah Brady           | Susan Narvaiz                |                       |
| Pauline Hanson                    | Sarah Palin           | Susan Ness                   |                       |
| Pearl S. Buck                     | Sarah Parker Remond   | Susana Martinez              |                       |
| Phyllis Chesler                   | Shannon Lucid         | Susanne Agnelli              |                       |
| Phyllis E. Oakley                 | Shari Steele          | Suzan DelBene                |                       |
| Phyllis Greenberger               | Sharon Sayles Belton  | Suzanne Bonamici             |                       |
| Phyllis Schlafly                  | Sheikh Hasina         | Suzanne Crouch               |                       |
| Polly Peachum                     | Sheila Jackson Lee    | Suzanne M Kosmas             |                       |
| Pratibha D Patil                  | Sheila Oliver         | Takako Doi                   |                       |
| Queen Elizabeth I                 | Sheila Simon          | Tamika Mallory               |                       |
| Queen Elizabeth II                | Sheila Widnall        | Tammy Duckworth              |                       |
| Queen Noor of Jordan              | Shelley Berkley       | Tammy S Baldwin              |                       |
| Queen Raina of Jordan             | Shelley L. Davis      | Tanya Metaksa                |                       |
| Queen Victoria                    | Shelley Moore Capito  | Tarana Burke                 |                       |
| Rachel Carson                     | Shenna Bellows        | Tarja K Halonen              |                       |
| Rachelle Chong                    | Sherrri W. Goodman    | Tempe Herndon Durham         |                       |
| Rebecca Kleefisch                 | Shirin Ebadi          | Terri Lynn Land              |                       |
| Rebecca L Felton                  | Shirley Chisholm      | Terri Sewell                 |                       |
| Rebecca Michelle "Mikie" Sherrill | Shirley Franklin      | Thelma Catherine "Pat" Nixon |                       |
| Regina C. Brown                   | Shirley M. Hufstedler | Theresa May                  |                       |
| Ren Volpe                         | Shirley M. Malcom     | Tina Smith                   |                       |
| Renee Chelian                     | Sissela Bok           | Toni Morrison                |                       |
| Renee Ellmers                     | Sojourner Truth       | Tsai Ing-wen                 |                       |
| Rigoberta Menchu Tum              | Soledad O'Brien       | Tulsi Gabbard                |                       |
| Rita Levi-Montalcini              | Somaia Barghouti      | Urvashi Vaid                 |                       |
| Roberta L. Gross                  | Sonia Fuentes         | Usha Narayanan               |                       |
| Roberta R. Katz                   | Sonia Johnson         | Vaira Vike-Freiberga         |                       |
| Robin Abrams                      | Sonia Sotomayor       | Valdez "Val" Demings         |                       |
| Ronda Hauben                      | Stacey Abrams         | Valentina Tereshkova         |                       |
| Rosa L. DeLauro                   | Stacey Plaskett       | Valerie Solanas              |                       |
| Rosa Parks                        | Staci Appel           | Vandana Shiva                |                       |
| Rosalyn S. Yalow                  | Stephanie H Sandlin   | Vesna Pesic                  |                       |
| Rosalynn Carter                   | Stephanie Murphy      | Vicky Hartzler               |                       |
| Rosario G. Manalo                 | Stephanie Tubbs Jones | Victoria C. Woodhull         |                       |
| Roxanne Qualls                    | Sue Ellspermann       | Virginia Foxx                |                       |
| Roza Otunbayeva                   | Sue Minter            | Wanda Wilk                   |                       |
| Ruth A Minner                     | Sue Suter             | Wangari Maathai              |                       |
| Ruth Bader Ginsburg               | Susan Allen           | Wendy Davis                  |                       |
| Ruth Mandel                       | Susan B. Anthony      | Wendy Long                   |                       |
| Ruth Simmons                      | Susan Brooks          | Wilma Mankiller              |                       |

## Appendix C

### LDA-Based Topic Modelling

In addition to the transformer model reported in the paper, we also calculated an LDA-based model for robustness. Specifically, we have calculated the Coherence score using our corpus for the LDA-based mCTM. Our coherence measure  $C_v$  uses a sliding window principle, considering a one-set segmentation of top verbal terms as well as a validation measure based on the normalized pointwise mutual information (NPMI) and the cosine similarity. Figure C1 below shows coherence scores for the number of topics 1 to 20. It demonstrates that the optimal number of topics is 17, yielding the highest coherence score of 0.421.

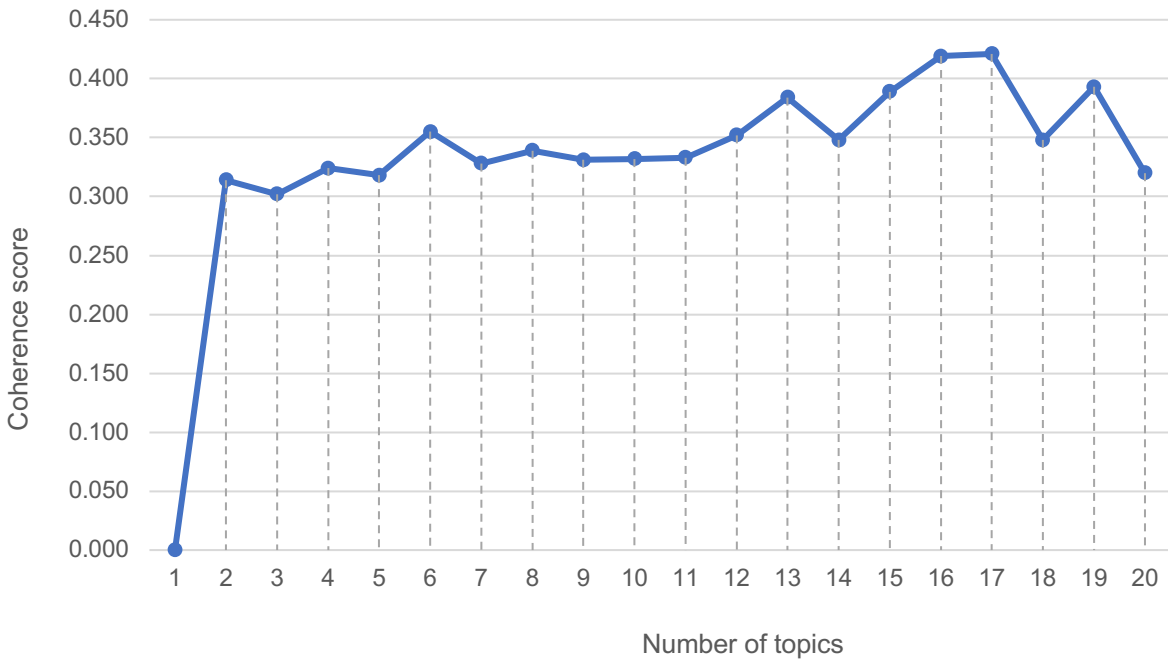

**Figure C1** Coherence Score and Optimal Number of Topics

Our analysis also shows that all 17 topics are distinct with only minor overlaps present between them as demonstrated on Figure C2.

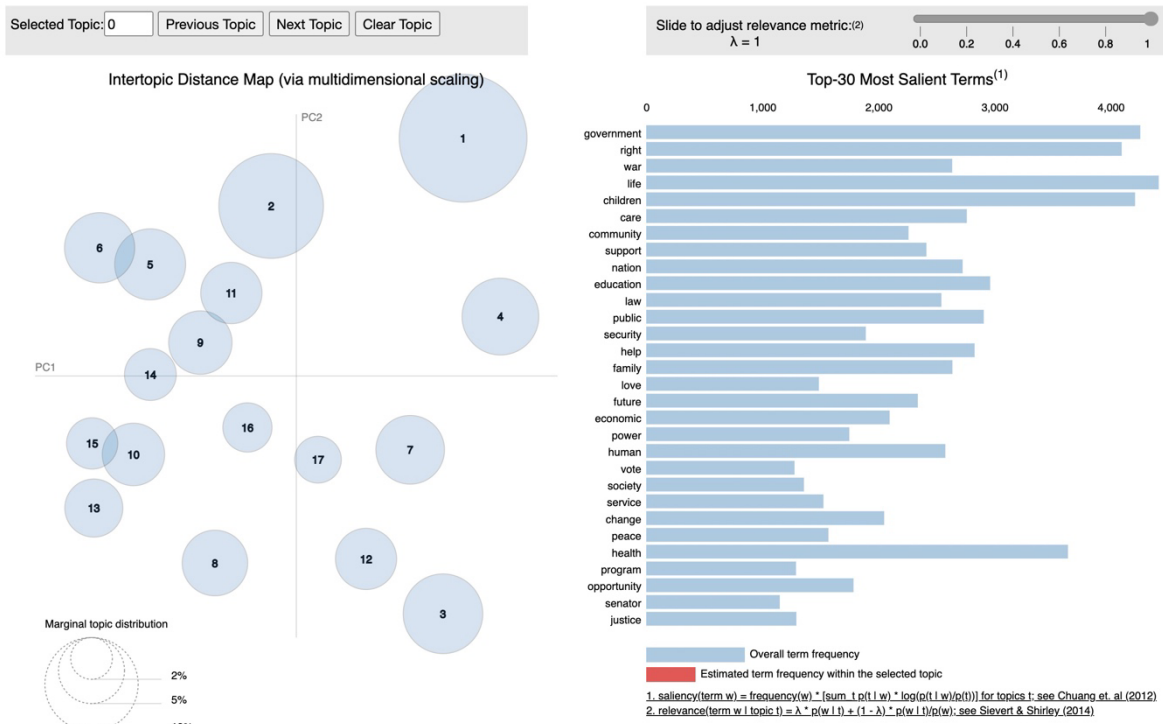

**Figure C2** Inter-topic Distance Map



## Appendix D

### Table D1 Multilevel Regression Results

#### Topic 1:

|                 | <b>Coefficient</b> | <b>SE</b> | <b>t</b> | <b>P&gt;t</b> | <b>[95% Conf. Interval]</b> |        |
|-----------------|--------------------|-----------|----------|---------------|-----------------------------|--------|
| <b>A</b>        | -0.0087            | 0.0185    | -0.47    | 0.64          | -0.0451                     | 0.0276 |
| <b>B</b>        | 0.0256             | 0.0151    | 1.7      | 0.09          | -0.0040                     | 0.0551 |
| <b>H</b>        | -0.0069            | 0.0215    | -0.32    | 0.75          | -0.0492                     | 0.0353 |
| <b>W</b>        | 0.0085             | 0.0132    | 0.64     | 0.52          | -0.0174                     | 0.0344 |
| <b>Constant</b> | 0.0344             | 0.0127    | 2.7      | 0.01          | 0.0094                      | 0.0594 |
| $\sigma_u$      | 0.0409             |           |          |               |                             |        |
| $\sigma_e$      | 0.1141             |           |          |               |                             |        |
| $\rho$          | 0.1136             |           |          |               |                             |        |
| <b>p</b>        | 0.1129             |           |          |               |                             |        |

#### Topic 2:

|                 | <b>Coefficient</b> | <b>SE</b> | <b>t</b> | <b>P&gt;t</b> | <b>[95% Conf. Interval]</b> |           |
|-----------------|--------------------|-----------|----------|---------------|-----------------------------|-----------|
| <b>A</b>        | -0.0118176         | 0.0178437 | -0.66    | 0.508         | -0.0468198                  | 0.0231847 |
| <b>B</b>        | -0.004678          | 0.014484  | -0.32    | 0.747         | -0.0330899                  | 0.0237338 |
| <b>H</b>        | -0.0136192         | 0.0207159 | -0.66    | 0.511         | -0.0542556                  | 0.0270171 |
| <b>W</b>        | 0.0122197          | 0.0127169 | 0.96     | 0.337         | -0.0127258                  | 0.0371652 |
| <b>Constant</b> | 0.0194981          | 0.0122629 | 1.59     | 0.112         | -0.0045568                  | 0.043553  |
| $\sigma_u$      | 0.0173485          |           |          |               |                             |           |
| $\sigma_e$      | 0.10981818         |           |          |               |                             |           |
| $\rho$          | 0.02434837         |           |          |               |                             |           |
| <b>p</b>        | 0.0691             |           |          |               |                             |           |

#### Topic 3:

|                 | <b>Coefficient</b> | <b>SE</b> | <b>t</b> | <b>P&gt;t</b> | <b>[95% Conf. Interval]</b> |           |
|-----------------|--------------------|-----------|----------|---------------|-----------------------------|-----------|
| <b>A</b>        | -0.0174196         | 0.0153675 | -1.13    | 0.257         | -0.0475645                  | 0.0127252 |
| <b>B</b>        | -0.0094516         | 0.012474  | -0.76    | 0.449         | -0.0339206                  | 0.0150174 |
| <b>H</b>        | -0.0279376         | 0.0178411 | -1.57    | 0.118         | -0.0629347                  | 0.0070594 |
| <b>W</b>        | -0.0022418         | 0.0109521 | -0.2     | 0.838         | -0.0237255                  | 0.0192419 |
| <b>Constant</b> | 0.0320094          | 0.0105611 | 3.03     | 0.002         | 0.0112927                   | 0.0527261 |
| $\sigma_u$      | 0.02558392         |           |          |               |                             |           |
| $\sigma_e$      | 0.09457814         |           |          |               |                             |           |
| $\rho$          | 0.06818406         |           |          |               |                             |           |
| <b>p</b>        | 0.2543             |           |          |               |                             |           |

#### Topic 4:

|                 | <b>Coefficient</b> | <b>SE</b> | <b>t</b> | <b>P&gt;t</b> | <b>[95% Conf. Interval]</b> |           |
|-----------------|--------------------|-----------|----------|---------------|-----------------------------|-----------|
| <b>A</b>        | 0.0152418          | 0.015288  | 1        | 0.319         | -0.0147471                  | 0.0452307 |
| <b>B</b>        | -0.0002109         | 0.0124095 | -0.02    | 0.986         | -0.0245533                  | 0.0241316 |
| <b>H</b>        | -0.0050962         | 0.0177488 | -0.29    | 0.774         | -0.0399122                  | 0.0297198 |
| <b>W</b>        | 0.017188           | 0.0108955 | 1.58     | 0.115         | -0.0041846                  | 0.0385605 |
| <b>Constant</b> | 0.0217688          | 0.0105065 | 2.07     | 0.038         | 0.0011593                   | 0.0423784 |
| $\sigma_u$      | 0.01844077         |           |          |               |                             |           |
| $\sigma_e$      | 0.09408895         |           |          |               |                             |           |
| $\rho$          | 0.03699225         |           |          |               |                             |           |
| <b>p</b>        | 0.049              |           |          |               |                             |           |

**Topic 5:**

|                 | <b>Coefficient</b> | <b>SE</b> | <b>t</b> | <b>P&gt;t</b> | <b>[95% Conf. Interval]</b> |           |
|-----------------|--------------------|-----------|----------|---------------|-----------------------------|-----------|
| <b>A</b>        | 0.0057467          | 0.0107466 | 0.53     | 0.593         | -0.0153337                  | 0.0268272 |
| <b>B</b>        | 0.000486           | 0.0087231 | 0.06     | 0.956         | -0.0166253                  | 0.0175973 |
| <b>H</b>        | -0.0004875         | 0.0124764 | -0.04    | 0.969         | -0.0249611                  | 0.0239862 |
| <b>W</b>        | 0.0047462          | 0.0076589 | 0.62     | 0.536         | -0.0102775                  | 0.0197699 |
| <b>Constant</b> | 0.0290523          | 0.0073855 | 3.93     | 0             | 0.014565                    | 0.0435396 |
| $\sigma_u$      | 0.18905594         |           |          |               |                             |           |
| $\sigma_e$      | 0.06613907         |           |          |               |                             |           |
| $\rho$          | 0.89095826         |           |          |               |                             |           |
| <b>p</b>        | 0.8658             |           |          |               |                             |           |

**Topic 6:**

|                 | <b>Coefficient</b> | <b>SE</b> | <b>t</b> | <b>P&gt;t</b> | <b>[95% Conf. Interval]</b> |            |
|-----------------|--------------------|-----------|----------|---------------|-----------------------------|------------|
| <b>A</b>        | -0.0209618         | 0.0127969 | -1.64    | 0.102         | -0.0460641                  | 0.0041404  |
| <b>B</b>        | -0.0221644         | 0.0103874 | -2.13    | 0.033         | -0.0425402                  | -0.0017885 |
| <b>H</b>        | -0.0332112         | 0.0148567 | -2.24    | 0.026         | -0.062354                   | -0.0040684 |
| <b>W</b>        | -0.0119146         | 0.0091201 | -1.31    | 0.192         | -0.0298045                  | 0.0059754  |
| <b>Constant</b> | 0.038803           | 0.0087945 | 4.41     | 0             | 0.0215517                   | 0.0560543  |
| $\sigma_u$      | 0.01155267         |           |          |               |                             |            |
| $\sigma_e$      | 0.07875739         |           |          |               |                             |            |
| $\rho$          | 0.0210638          |           |          |               |                             |            |
| <b>p</b>        | 0.0721             |           |          |               |                             |            |

**Topic 7:**

|                 | <b>Coefficient</b> | <b>SE</b> | <b>t</b> | <b>P&gt;t</b> | <b>[95% Conf. Interval]</b> |           |
|-----------------|--------------------|-----------|----------|---------------|-----------------------------|-----------|
| <b>A</b>        | 0.0041188          | 0.0129274 | 0.32     | 0.75          | -0.0212396                  | 0.0294772 |
| <b>B</b>        | 0.0152631          | 0.0104934 | 1.45     | 0.146         | -0.0053207                  | 0.0358469 |
| <b>H</b>        | 0.0020082          | 0.0150083 | 0.13     | 0.894         | -0.0274319                  | 0.0314484 |
| <b>W</b>        | 0.0097326          | 0.0092132 | 1.06     | 0.291         | -0.00834                    | 0.0278051 |
| <b>Constant</b> | 0.0222846          | 0.0088842 | 2.51     | 0.012         | 0.0048574                   | 0.0397119 |
| $\sigma_u$      | 0.15155607         |           |          |               |                             |           |
| $\sigma_e$      | 0.07956099         |           |          |               |                             |           |
| $\rho$          | 0.78395477         |           |          |               |                             |           |
| <b>p</b>        | 0.5678             |           |          |               |                             |           |

**Topic 8:**

|                 | <b>Coefficient</b> | <b>SE</b> | <b>t</b> | <b>P&gt;t</b> | <b>[95% Conf. Interval]</b> |           |
|-----------------|--------------------|-----------|----------|---------------|-----------------------------|-----------|
| <b>A</b>        | -0.0108702         | 0.0089213 | -1.22    | 0.223         | -0.0283703                  | 0.0066299 |
| <b>B</b>        | -0.0033905         | 0.0072416 | -0.47    | 0.64          | -0.0175956                  | 0.0108146 |
| <b>H</b>        | -0.0059708         | 0.0103573 | -0.58    | 0.564         | -0.0262878                  | 0.0143461 |
| <b>W</b>        | -0.0075488         | 0.0063581 | -1.19    | 0.235         | -0.0200208                  | 0.0049232 |
| <b>Constant</b> | 0.02368            | 0.0061311 | 3.86     | 0             | 0.0116532                   | 0.0357067 |
| $\sigma_u$      | 0.00741713         |           |          |               |                             |           |
| $\sigma_e$      | 0.05490579         |           |          |               |                             |           |
| $\rho$          | 0.01792177         |           |          |               |                             |           |
| <b>p</b>        | 0.6132             |           |          |               |                             |           |

**Topic 9:**

|                 | <b>Coefficient</b> | <b>SE</b> | <b>t</b> | <b>P&gt;t</b> | <b>[95% Conf. Interval]</b> |           |
|-----------------|--------------------|-----------|----------|---------------|-----------------------------|-----------|
| <b>A</b>        | 0.0000031          | 0.0108916 | 0        | 1             | -0.0213618                  | 0.021368  |
| <b>B</b>        | -0.0007285         | 0.0088408 | -0.08    | 0.934         | -0.0180707                  | 0.0166137 |
| <b>H</b>        | 0.0150483          | 0.0126447 | 1.19     | 0.234         | -0.0097556                  | 0.0398521 |
| <b>W</b>        | 0.0025286          | 0.0077622 | 0.33     | 0.745         | -0.0126978                  | 0.017755  |
| <b>Constant</b> | 0.0126029          | 0.0074851 | 1.68     | 0.092         | -0.0020799                  | 0.0272857 |
| $\sigma_u$      | 0.02585957         |           |          |               |                             |           |
| $\sigma_e$      | 0.06703146         |           |          |               |                             |           |
| $\rho$          | 0.1295478          |           |          |               |                             |           |
| <b>p</b>        | 0.6981             |           |          |               |                             |           |

**Topic 10:**

|                 | <b>Coefficient</b> | <b>SE</b> | <b>t</b> | <b>P&gt;t</b> | <b>[95% Conf. Interval]</b> |           |
|-----------------|--------------------|-----------|----------|---------------|-----------------------------|-----------|
| <b>A</b>        | -0.0021607         | 0.0094925 | -0.23    | 0.82          | -0.0207812                  | 0.0164598 |
| <b>B</b>        | 0.0074235          | 0.0077052 | 0.96     | 0.335         | -0.0076911                  | 0.022538  |
| <b>H</b>        | 0.0005841          | 0.0110205 | 0.05     | 0.958         | -0.0210336                  | 0.0222018 |
| <b>W</b>        | 0.0075998          | 0.0067652 | 1.12     | 0.261         | -0.0056708                  | 0.0208703 |
| <b>Constant</b> | 0.0138962          | 0.0065236 | 2.13     | 0.033         | 0.0010995                   | 0.026693  |
| $\sigma_u$      | 0.00900854         |           |          |               |                             |           |
| $\sigma_e$      | 0.05842109         |           |          |               |                             |           |
| $\rho$          | 0.02322542         |           |          |               |                             |           |
| <b>p</b>        | 0.4977             |           |          |               |                             |           |

**Topic 11:**

|                 | <b>Coefficient</b> | <b>SE</b> | <b>t</b> | <b>P&gt;t</b> | <b>[95% Conf. Interval]</b> |           |
|-----------------|--------------------|-----------|----------|---------------|-----------------------------|-----------|
| <b>A</b>        | 0.0021359          | 0.0117896 | 0.18     | 0.856         | -0.0209906                  | 0.0252624 |
| <b>B</b>        | 0.0069491          | 0.0095698 | 0.73     | 0.468         | -0.011823                   | 0.0257212 |
| <b>H</b>        | 0.007286           | 0.0136873 | 0.53     | 0.595         | -0.019563                   | 0.034135  |
| <b>W</b>        | 0.0120188          | 0.0084023 | 1.43     | 0.153         | -0.0044631                  | 0.0285006 |
| <b>Constant</b> | 0.006579           | 0.0081023 | 0.81     | 0.417         | -0.0093144                  | 0.0224724 |
| $\sigma_u$      | 0.00996877         |           |          |               |                             |           |
| $\sigma_e$      | 0.07255846         |           |          |               |                             |           |
| $\rho$          | 0.01852619         |           |          |               |                             |           |
| <b>p</b>        | 0.4638             |           |          |               |                             |           |

**Topic 12:**

|                 | <b>Coefficient</b> | <b>SE</b> | <b>t</b> | <b>P&gt;t</b> | <b>[95% Conf. Interval]</b> |           |
|-----------------|--------------------|-----------|----------|---------------|-----------------------------|-----------|
| <b>A</b>        | 0.0452459          | 0.0118724 | 3.81     | 0             | 0.0219571                   | 0.0685348 |
| <b>B</b>        | 0.0029508          | 0.009637  | 0.31     | 0.76          | -0.0159531                  | 0.0218546 |
| <b>H</b>        | 0.0003623          | 0.0137834 | 0.03     | 0.979         | -0.0266751                  | 0.0273998 |
| <b>W</b>        | -0.0035233         | 0.0084612 | -0.42    | 0.677         | -0.0201209                  | 0.0130742 |
| <b>Constant</b> | 0.0199445          | 0.0081592 | 2.44     | 0.015         | 0.0039395                   | 0.0359495 |
| $\sigma_u$      | 0.03001355         |           |          |               |                             |           |
| $\sigma_e$      | 0.07306773         |           |          |               |                             |           |
| $\rho$          | 0.14436787         |           |          |               |                             |           |
| <b>p</b>        | 0.0000             |           |          |               |                             |           |

**Topic 13:**

|                 | <b>Coefficient</b> | <b>SE</b> | <b>t</b> | <b>P&gt;t</b> | <b>[95% Conf. Interval]</b> |           |
|-----------------|--------------------|-----------|----------|---------------|-----------------------------|-----------|
| <b>A</b>        | 0.0004617          | 0.0089025 | 0.05     | 0.959         | -0.0170015                  | 0.0179248 |
| <b>B</b>        | 0.0061515          | 0.0072263 | 0.85     | 0.395         | -0.0080236                  | 0.0203266 |
| <b>H</b>        | -0.0009924         | 0.0103355 | -0.1     | 0.924         | -0.0212665                  | 0.0192817 |
| <b>W</b>        | 0.0084757          | 0.0063447 | 1.34     | 0.182         | -0.00397                    | 0.0209214 |
| <b>Constant</b> | 0.0121652          | 0.0061182 | 1.99     | 0.047         | 0.0001638                   | 0.0241665 |
| $\sigma_u$      | 0.00792814         |           |          |               |                             |           |
| $\sigma_e$      | 0.05478995         |           |          |               |                             |           |
| $\rho$          | 0.02050885         |           |          |               |                             |           |
| <b>p</b>        | 0.4003             |           |          |               |                             |           |

**Topic 14:**

|                 | <b>Coefficient</b> | <b>SE</b> | <b>t</b> | <b>P&gt;t</b> | <b>[95% Conf. Interval]</b> |           |
|-----------------|--------------------|-----------|----------|---------------|-----------------------------|-----------|
| <b>A</b>        | 0.0061126          | 0.0061481 | 0.99     | 0.32          | -0.0059474                  | 0.0181727 |
| <b>B</b>        | -0.0001556         | 0.0049905 | -0.03    | 0.975         | -0.0099449                  | 0.0096338 |
| <b>H</b>        | -0.0033688         | 0.0071377 | -0.47    | 0.637         | -0.0173701                  | 0.0106326 |
| <b>W</b>        | 0.0010863          | 0.0043816 | 0.25     | 0.804         | -0.0075087                  | 0.0096813 |
| <b>Constant</b> | 0.017968           | 0.0042252 | 4.25     | 0             | 0.0096798                   | 0.0262561 |
| $\sigma_u$      | 0.01123702         |           |          |               |                             |           |
| $\sigma_e$      | 0.03783802         |           |          |               |                             |           |
| $\rho$          | 0.08104732         |           |          |               |                             |           |
| <b>p</b>        | 0.7141             |           |          |               |                             |           |

**Topic 15:**

|                 | <b>Coefficient</b> | <b>SE</b> | <b>t</b> | <b>P&gt;t</b> | <b>[95% Conf. Interval]</b> |           |
|-----------------|--------------------|-----------|----------|---------------|-----------------------------|-----------|
| <b>A</b>        | 0.0190764          | 0.0133425 | 1.43     | 0.153         | -0.0070963                  | 0.0452491 |
| <b>B</b>        | 0.0029007          | 0.0108303 | 0.27     | 0.789         | -0.018344                   | 0.0241455 |
| <b>H</b>        | 0.0038842          | 0.0154902 | 0.25     | 0.802         | -0.0265014                  | 0.0342697 |
| <b>W</b>        | 0.0125653          | 0.009509  | 1.32     | 0.187         | -0.0060875                  | 0.0312182 |
| <b>Constant</b> | 0.0122206          | 0.0091695 | 1.33     | 0.183         | -0.0057663                  | 0.0302075 |
| $\sigma_u$      | 0.03037847         |           |          |               |                             |           |
| $\sigma_e$      | 0.08211576         |           |          |               |                             |           |
| $\rho$          | 0.12038473         |           |          |               |                             |           |
| <b>p</b>        | 0.2959             |           |          |               |                             |           |

**Topic 16:**

|                 | <b>Coefficient</b> | <b>SE</b> | <b>t</b> | <b>P&gt;t</b> | <b>[95% Conf. Interval]</b> |           |
|-----------------|--------------------|-----------|----------|---------------|-----------------------------|-----------|
| <b>A</b>        | -0.0016172         | 0.0109108 | -0.15    | 0.882         | -0.0230198                  | 0.0197854 |
| <b>B</b>        | 0.0020345          | 0.0088565 | 0.23     | 0.818         | -0.0153384                  | 0.0194073 |
| <b>H</b>        | 0.0646801          | 0.0126671 | 5.11     | 0             | 0.0398324                   | 0.0895278 |
| <b>W</b>        | 0.0055443          | 0.007776  | 0.71     | 0.476         | -0.009709                   | 0.0207976 |
| <b>Constant</b> | 0.0137628          | 0.0074983 | 1.84     | 0.067         | -0.000946                   | 0.0284715 |
| $\sigma_u$      | 0.01374357         |           |          |               |                             |           |
| $\sigma_e$      | 0.06714993         |           |          |               |                             |           |
| $\rho$          | 0.04020556         |           |          |               |                             |           |
| <b>p</b>        | 0.0000             |           |          |               |                             |           |

**Topic 17:**

|                 | <b>Coefficient</b> | <b>SE</b> | <b>t</b> | <b>P&gt;t</b> | <b>[95% Conf. Interval]</b> |           |
|-----------------|--------------------|-----------|----------|---------------|-----------------------------|-----------|
| <b>A</b>        | 0.0094048          | 0.0095172 | 0.99     | 0.323         | -0.0092641                  | 0.0280737 |
| <b>B</b>        | -0.0071462         | 0.0077252 | -0.93    | 0.355         | -0.0223                     | 0.0080076 |
| <b>H</b>        | -0.0114792         | 0.0110491 | -1.04    | 0.299         | -0.0331531                  | 0.0101946 |
| <b>W</b>        | -0.0097353         | 0.0067827 | -1.44    | 0.151         | -0.0230403                  | 0.0035697 |
| <b>Constant</b> | 0.0268582          | 0.0065406 | 4.11     | 0             | 0.0140283                   | 0.0396882 |
| $\sigma_u$      | 0.00800149         |           |          |               |                             |           |
| $\sigma_e$      | 0.05857285         |           |          |               |                             |           |
| $\rho$          | 0.01831971         |           |          |               |                             |           |
| <b>p</b>        | 0.0699             |           |          |               |                             |           |

**Topic 18:**

|                 | <b>Coefficient</b> | <b>SE</b> | <b>t</b> | <b>P&gt;t</b> | <b>[95% Conf. Interval]</b> |           |
|-----------------|--------------------|-----------|----------|---------------|-----------------------------|-----------|
| <b>A</b>        | 0.0032789          | 0.0097464 | 0.34     | 0.737         | -0.0158397                  | 0.0223976 |
| <b>B</b>        | -0.0091749         | 0.0079113 | -1.16    | 0.246         | -0.0246938                  | 0.0063439 |
| <b>H</b>        | -0.0109939         | 0.0113153 | -0.97    | 0.331         | -0.03319                    | 0.0112021 |
| <b>W</b>        | -0.0083523         | 0.0069461 | -1.2     | 0.229         | -0.0219778                  | 0.0052732 |
| <b>Constant</b> | 0.0264038          | 0.0066981 | 3.94     | 0             | 0.0132647                   | 0.0395428 |
| $\sigma_u$      | 0.03420509         |           |          |               |                             |           |
| $\sigma_e$      | 0.05998386         |           |          |               |                             |           |
| $\rho$          | 0.24538078         |           |          |               |                             |           |
| <b>p</b>        | 0.4124             |           |          |               |                             |           |

**Topic 19:**

|                 | <b>Coefficient</b> | <b>SE</b> | <b>t</b> | <b>P&gt;t</b> | <b>[95% Conf. Interval]</b> |           |
|-----------------|--------------------|-----------|----------|---------------|-----------------------------|-----------|
| <b>A</b>        | 0.0309452          | 0.0067927 | 4.56     | 0             | 0.0176206                   | 0.0442698 |
| <b>B</b>        | 0.010586           | 0.0055138 | 1.92     | 0.055         | -0.0002298                  | 0.0214017 |
| <b>H</b>        | 0.0202071          | 0.0078861 | 2.56     | 0.01          | 0.0047377                   | 0.0356764 |
| <b>W</b>        | 0.003718           | 0.0048411 | 0.77     | 0.443         | -0.0057782                  | 0.0132143 |
| <b>Constant</b> | 0.014119           | 0.0046682 | 3.02     | 0.003         | 0.0049618                   | 0.0232762 |
| $\sigma_u$      | 0.0137481          |           |          |               |                             |           |
| $\sigma_e$      | 0.04180539         |           |          |               |                             |           |
| $\rho$          | 0.09759401         |           |          |               |                             |           |
| <b>p</b>        | 0.0000             |           |          |               |                             |           |

**Topic 20:**

|                 | <b>Coefficient</b> | <b>SE</b> | <b>t</b> | <b>P&gt;t</b> | <b>[95% Conf. Interval]</b> |           |
|-----------------|--------------------|-----------|----------|---------------|-----------------------------|-----------|
| <b>A</b>        | 0.0013649          | 0.0109235 | 0.12     | 0.901         | -0.0200626                  | 0.0227925 |
| <b>B</b>        | 0.0047017          | 0.0088668 | 0.53     | 0.596         | -0.0126913                  | 0.0220947 |
| <b>H</b>        | 0.0154938          | 0.0126818 | 1.22     | 0.222         | -0.0093828                  | 0.0403703 |
| <b>W</b>        | 0.0115359          | 0.007785  | 1.48     | 0.139         | -0.0037352                  | 0.026807  |
| <b>Constant</b> | 0.010944           | 0.0075071 | 1.46     | 0.145         | -0.0037818                  | 0.0256698 |
| $\sigma_u$      | 0.01091031         |           |          |               |                             |           |
| $\sigma_e$      | 0.06722803         |           |          |               |                             |           |
| $\rho$          | 0.02566157         |           |          |               |                             |           |
| <b>p</b>        | 0.2854             |           |          |               |                             |           |

**Topic 21:**

|                 | <b>Coefficient</b> | <b>SE</b> | <b>t</b> | <b>P&gt;t</b> | <b>[95% Conf. Interval]</b> |           |
|-----------------|--------------------|-----------|----------|---------------|-----------------------------|-----------|
| <b>A</b>        | 0.0012727          | 0.0093474 | 0.14     | 0.892         | -0.0170631                  | 0.0196085 |
| <b>B</b>        | -0.0004741         | 0.0075874 | -0.06    | 0.95          | -0.0153576                  | 0.0144093 |
| <b>H</b>        | -0.0044569         | 0.010852  | -0.41    | 0.681         | -0.0257441                  | 0.0168303 |
| <b>W</b>        | 0.006162           | 0.0066617 | 0.92     | 0.355         | -0.0069056                  | 0.0192296 |
| <b>Constant</b> | 0.0126828          | 0.0064239 | 1.97     | 0.049         | 0.0000818                   | 0.0252839 |
| $\sigma_u$      | 0.00968183         |           |          |               |                             |           |
| $\sigma_e$      | 0.05752783         |           |          |               |                             |           |
| $\rho$          | 0.0275441          |           |          |               |                             |           |
| <b>p</b>        | 0.3741             |           |          |               |                             |           |

**Topic 22:**

|                 | <b>Coefficient</b> | <b>SE</b> | <b>t</b> | <b>P&gt;t</b> | <b>[95% Conf. Interval]</b> |           |
|-----------------|--------------------|-----------|----------|---------------|-----------------------------|-----------|
| <b>A</b>        | 0.0010987          | 0.0104856 | 0.1      | 0.917         | -0.0194699                  | 0.0216672 |
| <b>B</b>        | 0.0175852          | 0.0085113 | 2.07     | 0.039         | 0.0008893                   | 0.034281  |
| <b>H</b>        | 0.0054026          | 0.0121734 | 0.44     | 0.657         | -0.0184767                  | 0.029282  |
| <b>W</b>        | 0.0124156          | 0.0074729 | 1.66     | 0.097         | -0.0022433                  | 0.0270744 |
| <b>Constant</b> | 0.0075454          | 0.0072061 | 1.05     | 0.295         | -0.0065901                  | 0.0216809 |
| $\sigma_u$      | 0.02279568         |           |          |               |                             |           |
| $\sigma_e$      | 0.06453309         |           |          |               |                             |           |
| $\rho$          | 0.11093618         |           |          |               |                             |           |
| <b>p</b>        | 0.1517             |           |          |               |                             |           |

**Topic 23:**

|                 | <b>Coefficient</b> | <b>SE</b> | <b>t</b> | <b>P&gt;t</b> | <b>[95% Conf. Interval]</b> |           |
|-----------------|--------------------|-----------|----------|---------------|-----------------------------|-----------|
| <b>A</b>        | -0.0060235         | 0.0100895 | -0.6     | 0.551         | -0.025815                   | 0.013768  |
| <b>B</b>        | -0.0005327         | 0.0081898 | -0.07    | 0.948         | -0.0165977                  | 0.0155323 |
| <b>H</b>        | -0.0139343         | 0.0117135 | -1.19    | 0.234         | -0.0369114                  | 0.0090429 |
| <b>W</b>        | -0.0070267         | 0.0071906 | -0.98    | 0.329         | -0.0211317                  | 0.0070784 |
| <b>Constant</b> | 0.021967           | 0.0069339 | 3.17     | 0.002         | 0.0083655                   | 0.0355685 |
| $\sigma_u$      | 0.08403821         |           |          |               |                             |           |
| $\sigma_e$      | 0.06209493         |           |          |               |                             |           |
| $\rho$          | 0.64684839         |           |          |               |                             |           |
| <b>p</b>        | 0.489              |           |          |               |                             |           |

**Topic 24:**

|                 | <b>Coefficient</b> | <b>SE</b> | <b>t</b> | <b>P&gt;t</b> | <b>[95% Conf. Interval]</b> |           |
|-----------------|--------------------|-----------|----------|---------------|-----------------------------|-----------|
| <b>A</b>        | 0.0063183          | 0.0081099 | 0.78     | 0.436         | -0.00959                    | 0.0222267 |
| <b>B</b>        | -0.0028008         | 0.0065829 | -0.43    | 0.671         | -0.0157139                  | 0.0101123 |
| <b>H</b>        | -0.0030539         | 0.0094153 | -0.32    | 0.746         | -0.0215229                  | 0.0154152 |
| <b>W</b>        | -0.0012486         | 0.0057798 | -0.22    | 0.829         | -0.0125862                  | 0.0100891 |
| <b>Constant</b> | 0.0220874          | 0.0055734 | 3.96     | 0             | 0.0111545                   | 0.0330203 |
| $\sigma_u$      | 0.13174798         |           |          |               |                             |           |
| $\sigma_e$      | 0.04991194         |           |          |               |                             |           |
| $\rho$          | 0.87449064         |           |          |               |                             |           |
| <b>p</b>        | 0.7566             |           |          |               |                             |           |

**Topic 25:**

|                 | <b>Coefficient</b> | <b>SE</b> | <b>t</b> | <b>P&gt;t</b> | <b>[95% Conf. Interval]</b> |           |
|-----------------|--------------------|-----------|----------|---------------|-----------------------------|-----------|
| <b>A</b>        | 0.0060186          | 0.0080432 | 0.75     | 0.454         | -0.0097589                  | 0.0217961 |
| <b>B</b>        | 0.0067111          | 0.0065288 | 1.03     | 0.304         | -0.0060957                  | 0.0195179 |
| <b>H</b>        | 0.000454           | 0.0093378 | 0.05     | 0.961         | -0.017863                   | 0.0187711 |
| <b>W</b>        | 0.0060902          | 0.0057322 | 1.06     | 0.288         | -0.0051541                  | 0.0173345 |
| <b>Constant</b> | 0.0144475          | 0.0055276 | 2.61     | 0.009         | 0.0036046                   | 0.0252904 |
| $\sigma_u$      | 0.0889037          |           |          |               |                             |           |
| $\sigma_e$      | 0.04950116         |           |          |               |                             |           |
| $\rho$          | 0.76334654         |           |          |               |                             |           |
| <b>p</b>        | 0.7874             |           |          |               |                             |           |

**Topic 26:**

|                 | <b>Coefficient</b> | <b>SE</b> | <b>t</b> | <b>P&gt;t</b> | <b>[95% Conf. Interval]</b> |            |
|-----------------|--------------------|-----------|----------|---------------|-----------------------------|------------|
| <b>A</b>        | -0.0349834         | 0.009693  | -3.61    | 0             | -0.0539971                  | -0.0159697 |
| <b>B</b>        | -0.0267237         | 0.0078679 | -3.4     | 0.001         | -0.0421575                  | -0.01129   |
| <b>H</b>        | -0.0342112         | 0.0112532 | -3.04    | 0.002         | -0.0562854                  | -0.012137  |
| <b>W</b>        | -0.0262489         | 0.006908  | -3.8     | 0             | -0.0397997                  | -0.0126982 |
| <b>Constant</b> | 0.047118           | 0.0066614 | 7.07     | 0             | 0.0340511                   | 0.060185   |
| $\sigma_u$      | 0.01330718         |           |          |               |                             |            |
| $\sigma_e$      | 0.05965473         |           |          |               |                             |            |
| $\rho$          | 0.04740149         |           |          |               |                             |            |
| <b>p</b>        | 0.0015             |           |          |               |                             |            |

**Topic 27:**

|                 | <b>Coefficient</b> | <b>SE</b> | <b>t</b> | <b>P&gt;t</b> | <b>[95% Conf. Interval]</b> |            |
|-----------------|--------------------|-----------|----------|---------------|-----------------------------|------------|
| <b>A</b>        | -0.0120717         | 0.0094421 | -1.28    | 0.201         | -0.0305932                  | 0.0064499  |
| <b>B</b>        | -0.0182831         | 0.0076643 | -2.39    | 0.017         | -0.0333173                  | -0.003249  |
| <b>H</b>        | -0.0255746         | 0.0109619 | -2.33    | 0.02          | -0.0470774                  | -0.0040718 |
| <b>W</b>        | -0.0201688         | 0.0067292 | -3       | 0.003         | -0.0333688                  | -0.0069688 |
| <b>Constant</b> | 0.0384037          | 0.0064889 | 5.92     | 0             | 0.0256749                   | 0.0511324  |
| $\sigma_u$      | 0.01343142         |           |          |               |                             |            |
| $\sigma_e$      | 0.0581105          |           |          |               |                             |            |
| $\rho$          | 0.05071445         |           |          |               |                             |            |
| <b>p</b>        | 0.0347             |           |          |               |                             |            |

**Topic 28:**

|                 | <b>Coefficient</b> | <b>SE</b> | <b>t</b> | <b>P&gt;t</b> | <b>[95% Conf. Interval]</b> |           |
|-----------------|--------------------|-----------|----------|---------------|-----------------------------|-----------|
| <b>A</b>        | 0.0395336          | 0.0113048 | 3.5      | 0             | 0.0173581                   | 0.0617091 |
| <b>B</b>        | 0.0137237          | 0.0091763 | 1.5      | 0.135         | -0.0042765                  | 0.0317239 |
| <b>H</b>        | 0.0338795          | 0.0131245 | 2.58     | 0.01          | 0.0081345                   | 0.0596244 |
| <b>W</b>        | 0.0102678          | 0.0080568 | 1.27     | 0.203         | -0.0055363                  | 0.026072  |
| <b>Constant</b> | 0.0078167          | 0.0077691 | 1.01     | 0.315         | -0.0074232                  | 0.0230565 |
| $\sigma_u$      | 0.0121416          |           |          |               |                             |           |
| $\sigma_e$      | 0.06957476         |           |          |               |                             |           |
| $\rho$          | 0.02955423         |           |          |               |                             |           |
| <b>p</b>        | 0.001              |           |          |               |                             |           |

**Topic 29:**

|                 | <b>Coefficient</b> | <b>SE</b> | <b>t</b> | <b>P&gt;t</b> | <b>[95% Conf. Interval]</b> |           |
|-----------------|--------------------|-----------|----------|---------------|-----------------------------|-----------|
| <b>A</b>        | -0.0079871         | 0.0119039 | -0.67    | 0.502         | -0.0313379                  | 0.0153636 |
| <b>B</b>        | 0.0045065          | 0.0096626 | 0.47     | 0.641         | -0.0144477                  | 0.0234606 |
| <b>H</b>        | -0.014082          | 0.01382   | -1.02    | 0.308         | -0.0411913                  | 0.0130273 |
| <b>W</b>        | -0.0019397         | 0.0084837 | -0.23    | 0.819         | -0.0185813                  | 0.014702  |
| <b>Constant</b> | 0.0223062          | 0.0081808 | 2.73     | 0.006         | 0.0062587                   | 0.0383537 |
| $\sigma_u$      | 0.00911434         |           |          |               |                             |           |
| $\sigma_e$      | 0.07326193         |           |          |               |                             |           |
| $\rho$          | 0.01524135         |           |          |               |                             |           |
| <b>p</b>        | 0.4993             |           |          |               |                             |           |

**Topic 30:**

|                 | <b>Coefficient</b> | <b>SE</b> | <b>t</b> | <b>P&gt;t</b> | <b>[95% Conf. Interval]</b> |            |
|-----------------|--------------------|-----------|----------|---------------|-----------------------------|------------|
| <b>A</b>        | -0.0177227         | 0.010524  | -1.68    | 0.092         | -0.0383666                  | 0.0029212  |
| <b>B</b>        | -0.0176349         | 0.0085425 | -2.06    | 0.039         | -0.0343919                  | -0.000878  |
| <b>H</b>        | -0.0194844         | 0.012218  | -1.59    | 0.111         | -0.0434512                  | 0.0044824  |
| <b>W</b>        | -0.0153784         | 0.0075003 | -2.05    | 0.041         | -0.0300909                  | -0.0006658 |
| <b>Constant</b> | 0.0307093          | 0.0072325 | 4.25     | 0             | 0.016522                    | 0.0448966  |
| $\sigma_u$      | 0.00879758         |           |          |               |                             |            |
| $\sigma_e$      | 0.06476945         |           |          |               |                             |            |
| $\rho$          | 0.01811533         |           |          |               |                             |            |
| <b>p</b>        | 0.2885             |           |          |               |                             |            |

**Topic 31:**

|                 | <b>Coefficient</b> | <b>SE</b> | <b>t</b> | <b>P&gt;t</b> | <b>[95% Conf. Interval]</b> |           |
|-----------------|--------------------|-----------|----------|---------------|-----------------------------|-----------|
| <b>A</b>        | 0.000427           | 0.0069309 | 0.06     | 0.951         | -0.0131686                  | 0.0140226 |
| <b>B</b>        | 0.0022947          | 0.0056259 | 0.41     | 0.683         | -0.008741                   | 0.0133305 |
| <b>H</b>        | 0.0006867          | 0.0080465 | 0.09     | 0.932         | -0.0150973                  | 0.0164707 |
| <b>W</b>        | 0.0062226          | 0.0049395 | 1.26     | 0.208         | -0.0034667                  | 0.015912  |
| <b>Constant</b> | 0.0111115          | 0.0047632 | 2.33     | 0.02          | 0.0017681                   | 0.0204549 |
| $\sigma_u$      | 0.01312592         |           |          |               |                             |           |
| $\sigma_e$      | 0.04265561         |           |          |               |                             |           |
| $\rho$          | 0.08649997         |           |          |               |                             |           |
| <b>p</b>        | 0.3966             |           |          |               |                             |           |

**Topic 32:**

|                 | <b>Coefficient</b> | <b>SE</b> | <b>t</b> | <b>P&gt;t</b> | <b>[95% Conf. Interval]</b> |            |
|-----------------|--------------------|-----------|----------|---------------|-----------------------------|------------|
| <b>A</b>        | -0.0228052         | 0.0089911 | -2.54    | 0.011         | -0.0404422                  | -0.0051682 |
| <b>B</b>        | -0.0237924         | 0.0072982 | -3.26    | 0.001         | -0.0381086                  | -0.0094762 |
| <b>H</b>        | -0.0279599         | 0.0104384 | -2.68    | 0.007         | -0.0484358                  | -0.007484  |
| <b>W</b>        | -0.0226082         | 0.0064078 | -3.53    | 0             | -0.0351778                  | -0.0100386 |
| <b>Constant</b> | 0.0406079          | 0.0061791 | 6.57     | 0             | 0.0284871                   | 0.0527287  |
| $\sigma_u$      | 0.00881952         |           |          |               |                             |            |
| $\sigma_e$      | 0.05533535         |           |          |               |                             |            |
| $\rho$          | 0.02477364         |           |          |               |                             |            |
| <b>p</b>        | 0.0095             |           |          |               |                             |            |



**Topic 33:**

|                 | <b>Coefficient</b> | <b>SE</b> | <b>t</b> | <b>P&gt;t</b> | <b>[95% Conf. Interval]</b> |           |
|-----------------|--------------------|-----------|----------|---------------|-----------------------------|-----------|
| <b>A</b>        | -0.0012388         | 0.0116715 | -0.11    | 0.915         | -0.0241336                  | 0.021656  |
| <b>B</b>        | 0.0347934          | 0.0094739 | 3.67     | 0             | 0.0162093                   | 0.0533774 |
| <b>H</b>        | 0.0016757          | 0.0135502 | 0.12     | 0.902         | -0.0249043                  | 0.0282558 |
| <b>W</b>        | 0.0061841          | 0.0083181 | 0.74     | 0.457         | -0.0101327                  | 0.0225008 |
| <b>Constant</b> | 0.015009           | 0.0080211 | 1.87     | 0.062         | -0.0007253                  | 0.0307432 |
| $\sigma_u$      | 0.02609828         |           |          |               |                             |           |
| $\sigma_e$      | 0.07183162         |           |          |               |                             |           |
| $\rho$          | 0.11661213         |           |          |               |                             |           |
| <b>p</b>        | 0.0000             |           |          |               |                             |           |

**Topic 34:**

|                 | <b>Coefficient</b> | <b>SE</b> | <b>t</b> | <b>P&gt;t</b> | <b>[95% Conf. Interval]</b> |           |
|-----------------|--------------------|-----------|----------|---------------|-----------------------------|-----------|
| <b>A</b>        | -0.0010396         | 0.0055647 | -0.19    | 0.852         | -0.0119553                  | 0.0098762 |
| <b>B</b>        | 0.0036688          | 0.004517  | 0.81     | 0.417         | -0.0051916                  | 0.0125293 |
| <b>H</b>        | -0.0053745         | 0.0064604 | -0.83    | 0.406         | -0.0180473                  | 0.0072983 |
| <b>W</b>        | 0.0014463          | 0.0039659 | 0.36     | 0.715         | -0.0063332                  | 0.0092257 |
| <b>Constant</b> | 0.0141323          | 0.0038243 | 3.7      | 0             | 0.0066306                   | 0.021634  |
| $\sigma_u$      | 0.0061823          |           |          |               |                             |           |
| $\sigma_e$      | 0.03424771         |           |          |               |                             |           |
| $\rho$          | 0.0315581          |           |          |               |                             |           |
| <b>p</b>        | 0.5348             |           |          |               |                             |           |

**Topic 35:**

|                 | <b>Coefficient</b> | <b>SE</b> | <b>t</b> | <b>P&gt;t</b> | <b>[95% Conf. Interval]</b> |           |
|-----------------|--------------------|-----------|----------|---------------|-----------------------------|-----------|
| <b>A</b>        | 0.000515           | 0.0075756 | 0.07     | 0.946         | -0.0143452                  | 0.0153752 |
| <b>B</b>        | 0.0024042          | 0.0061492 | 0.39     | 0.696         | -0.009658                   | 0.0144665 |
| <b>H</b>        | 0.0474069          | 0.0087949 | 5.39     | 0             | 0.0301548                   | 0.0646591 |
| <b>W</b>        | 0.0025999          | 0.005399  | 0.48     | 0.63          | -0.0079907                  | 0.0131905 |
| <b>Constant</b> | 0.0154413          | 0.0052062 | 2.97     | 0.003         | 0.0052288                   | 0.0256538 |
| $\sigma_u$      | 0.08403941         |           |          |               |                             |           |
| $\sigma_e$      | 0.04662324         |           |          |               |                             |           |
| $\rho$          | 0.76465521         |           |          |               |                             |           |
| <b>p</b>        | 0.0000             |           |          |               |                             |           |

*Notes: In all regression, the number of observations was 1,599. Panel effects were measured at the level of each year and each individual within a year.*

## Appendix E

**Table E1** Standard Deviations in Behavioral Schemas by Group

| <b>Behavioral Schema=Topic</b>                       | <b>SD (B)</b> | <b>SD(W)</b> | <b>SD(A)</b> | <b>SD(H)</b> |
|------------------------------------------------------|---------------|--------------|--------------|--------------|
| Future and nation                                    | 0.13215539    | 0.07096267   | 0.02641084   | 0.10643747   |
| Environment, sustainability, energy, and water       | 0.03104003    | 0.10848524   | 0.0166035    | 0.00397762   |
| Healthcare                                           | 0.06102255    | 0.08928849   | 0.00798762   | 0.02452031   |
| Jobs, economy, and employment                        | 0.0401674     | 0.08092493   | 0.06967997   | 0.02518888   |
| Women's rights                                       | 0.05374145    | 0.07853714   | 0.01425212   | 0.0066645    |
| Budget, public policy, government, and taxes         | 0.04163614    | 0.04071339   | 0.01080844   | 0.01203942   |
| Diversity, race, gender, and childhood opportunities | 0.11984762    | 0.08930144   | 0.0172355    | 0.00590514   |
| Domestic violence                                    | 0.03039594    | 0.05044836   | 0.00410313   | 0.05376326   |
| Pregnancy, abortion, and women's right to choose     | 0.05174054    | 0.0728277    | 0.0370223    | 0.09550122   |
| Life and education                                   | 0.01369916    | 0.02515177   | 0.00457503   | 0.02007338   |
| Cyber security, internet technology                  | 0.00563853    | 0.10507573   | 0.00501471   | 0.00523821   |
| Refugees and humanitarian action                     | 0.04014463    | 0.06421017   | 0.07956091   | 0.01631757   |
| Higher education                                     | 0.01237452    | 0.05346389   | 0.00408097   | 0.02382805   |
| War and nuclear weapons                              | 0.0144685     | 0.02491957   | 0.01318286   | 0.01081873   |
| Justice                                              | 0.01234232    | 0.10074098   | 0.02277286   | 0.01760659   |
| Defense and military                                 | 0.0084749     | 0.03657214   | 0.00633999   | 0.09941534   |
| Europe, integration, European Union                  | 0.02362982    | 0.04941613   | 0.07482441   | 0.02352022   |
| Peace and regional conflict                          | 0.01755909    | 0.03283828   | 0.01987115   | 0.01082456   |
| Diplomacy                                            | 0.01774451    | 0.0300059    | 0.04285244   | 0.04930223   |
| Public education and children                        | 0.00932149    | 0.08372629   | 0.0055778    | 0.05471441   |
| Art and music                                        | 0.0064378     | 0.05171165   | 0.02080816   | 0.00742223   |
| Cities and neighborhoods                             | 0.10096303    | 0.06958476   | 0.00447554   | 0.00695796   |
| HIV, AIDS                                            | 0.1015179     | 0.07790498   | 0.00941975   | 0.01122559   |
| United Nations and human rights                      | 0.01080196    | 0.07621577   | 0.01383377   | 0.00737286   |
| Love and family                                      | 0.01335262    | 0.06824225   | 0.03076132   | 0.01139371   |
| Disability                                           | 0.01363561    | 0.03638535   | 0.005183     | 0.00824454   |
| Science and technology                               | 0.03554556    | 0.05296937   | 0.07072794   | 0.00753775   |
| Development and poverty                              | 0.10189973    | 0.0515706    | 0.06597524   | 0.04517742   |
| Law                                                  | 0.05264908    | 0.06512539   | 0.00887556   | 0.00727487   |
| Space                                                | 0.00666454    | 0.08078904   | 0.00641349   | 0.00854833   |
| Mental health and self-help                          | 0.00649349    | 0.05448193   | 0.00470758   | 0.00527616   |
| Army and military service                            | 0.00891627    | 0.01614034   | 0.01172354   | 0.00861587   |
| Rights of black community                            | 0.11102       | 0.06182198   | 0.00847849   | 0.01087088   |
| Chronic debt                                         | 0.03393534    | 0.01716561   | 0.0054642    | 0.00707651   |
| Labor union and workers                              | 0.01290924    | 0.02480253   | 0.00655474   | 0.19945119   |

*Notes: B- female leaders with any Black background; W – female leaders with any White background; A- female leaders with any Asian background; H – female leaders with any Hispanic/Latino background. In the paper, we concentrate on black female leaders. Results for Asian and Hispanic/Latino groups are included to demonstrate that the results are similar to those obtained for the Black background group (though sample sizes in those groups are significantly smaller as reported in the paper).*
